# Supplementary material
Source: PubMed Central journal article supplement (PMC4078278)
Supplement: amiajnl-2013-002284-s1.pdf [file amiajnl-2013-002284-s1.pdf]

## Appendix 1 – List of Personal Health Records Reviewed

| Personal Health Record Websites                                                                                                               | Operational? | Payment required? |
|-----------------------------------------------------------------------------------------------------------------------------------------------|--------------|-------------------|
| 1. <a href="http://aboutmyhealth.org">aboutmyhealth.org</a>                                                                                   | no           | no                |
| 2. <a href="http://amesmyfile.com">amesmyfile.com</a>                                                                                         | yes          | yes               |
| 3. <a href="http://www.thesmartphr.com/index.php">http://www.thesmartphr.com/index.php</a>                                                    | yes          | yes               |
| 4. <a href="http://www.drinet.com/">http://www.drinet.com/</a>                                                                                | yes          | no                |
| 5. <a href="http://www.drglobe.com/">http://www.drglobe.com/</a>                                                                              | yes          | yes               |
| 6. <a href="http://www.followme.com/">http://www.followme.com/</a>                                                                            | yes          | yes               |
| 7. <a href="http://www.fullcircleregistry.com/">http://www.fullcircleregistry.com/</a>                                                        | yes          | yes               |
| 8. <a href="http://www.globalpatientrecord.com/">http://www.globalpatientrecord.com/</a>                                                      | yes          | yes               |
| 9. <a href="http://www.handymedical.com/">http://www.handymedical.com/</a>                                                                    | yes          | yes               |
| 10. <a href="http://www.healthrecordsonline.com/">http://www.healthrecordsonline.com/</a>                                                     | yes          | yes               |
| 11. <a href="http://healthbutler.com/">http://healthbutler.com/</a>                                                                           | yes          | no                |
| 12. <a href="http://www.healthcapture.com/phr/index.php">http://www.healthcapture.com/phr/index.php</a>                                       | no           | yes               |
| 13. <a href="http://www.healthetracks.com/">http://www.healthetracks.com/</a>                                                                 | yes          | yes               |
| 14. <a href="https://www.healthgram.com/htsecure/members/index.cfm">https://www.healthgram.com/htsecure/members/index.cfm</a>                 | yes          | yes               |
| 15. <a href="https://www.healthstring.com/">https://www.healthstring.com/</a>                                                                 | yes          | yes               |
| 16. <a href="http://www.healthtracer.com/">http://www.healthtracer.com/</a>                                                                   | yes          | yes               |
| 17. <a href="http://www.ihealthrecord.org/">http://www.ihealthrecord.org/</a>                                                                 | yes          | no                |
| 18. <a href="http://www.cerner.com/public/Cerner_3.asp?id=27237">http://www.cerner.com/public/Cerner_3.asp?id=27237</a>                       | yes          | yes               |
| 19. <a href="http://www.i-trax.com/OurSolutions/OurSolutions.asp">http://www.i-trax.com/OurSolutions/OurSolutions.asp</a>                     | yes          | yes               |
| 20. <a href="https://www.sanfordhealth.org/iValley/index.cfm?">https://www.sanfordhealth.org/iValley/index.cfm?</a>                           | yes          | no                |
| 21. <a href="http://kismedicalrecords.com/">http://kismedicalrecords.com/</a>                                                                 | yes          | yes               |
| 22. <a href="http://www.laxor.com/">http://www.laxor.com/</a>                                                                                 | yes          | yes               |
| 23. <a href="http://www.elderissues.com/">http://www.elderissues.com/</a>                                                                     | yes          | yes               |
| 24. <a href="http://www.lifemasters.com/">http://www.lifemasters.com/</a>                                                                     | yes          | no                |
| 25. <a href="https://www.lifesensor.com/en/us/">https://www.lifesensor.com/en/us/</a>                                                         | yes          | yes               |
| 26. <a href="http://www.lynxcare.net/">http://www.lynxcare.net/</a>                                                                           | yes          | yes               |
| 27. <a href="http://www.meddatanet.com/">http://www.meddatanet.com/</a>                                                                       | yes          | yes               |
| 28. <a href="http://www.medefile.com/">http://www.medefile.com/</a>                                                                           | yes          | yes               |
| 29. <a href="http://med-id-card.com/">http://med-id-card.com/</a>                                                                             | yes          | yes               |
| 30. <a href="http://www.medicalert.org/home/Homegradient.aspx">http://www.medicalert.org/home/Homegradient.aspx</a>                           | yes          | yes               |
| 31. <a href="http://www.medicalsummary.com/">http://www.medicalsummary.com/</a>                                                               | no           | yes               |
| 32. <a href="http://www.medicompass.com/">http://www.medicompass.com/</a>                                                                     | yes          | yes               |
| 33. <a href="http://www.medikeeper.com/">http://www.medikeeper.com/</a>                                                                       | yes          | yes               |
| 34. <a href="http://www.mednotice.com/">http://www.mednotice.com/</a>                                                                         | yes          | yes               |
| 35. <a href="http://www.myhealth123.com/index-p-ie/index-p-ie.asp?wname=44">http://www.myhealth123.com/index-p-ie/index-p-ie.asp?wname=44</a> | yes          | yes               |
| 36. <a href="http://www.myhealth.va.gov/">http://www.myhealth.va.gov/</a>                                                                     | yes          | no                |
| 37. <a href="http://www.doctorglobal.com/index2.asp">http://www.doctorglobal.com/index2.asp</a>                                               | yes          | yes               |
| 38. <a href="https://www.mymedicalrecords.com/login.jsp">https://www.mymedicalrecords.com/login.jsp</a>                                       | yes          | yes               |
| 39. <a href="http://www.mymedilist.org/">http://www.mymedilist.org/</a>                                                                       | yes          | no                |
| 40. <a href="http://www.mynetrecord.com/">http://www.mynetrecord.com/</a>                                                                     | yes          | yes               |
| 41. <a href="http://www.nomoreclipboard.com/">http://www.nomoreclipboard.com/</a>                                                             | yes          | yes               |
| 42. <a href="http://www.myomr.com/">http://www.myomr.com/</a>                                                                                 | yes          | yes               |
| 43. <a href="http://gtipatientpower.com/">http://gtipatientpower.com/</a>                                                                     | yes          | yes               |
| 44. <a href="http://www.patienttrak.com/patienttrak/">http://www.patienttrak.com/patienttrak/</a>                                             | yes          | yes               |

| Personal Health Record Websites                                                                                                                                                                                                     | Operational? | Payment required? |
|-------------------------------------------------------------------------------------------------------------------------------------------------------------------------------------------------------------------------------------|--------------|-------------------|
| 45. <a href="http://www.peoplechart.com/">http://www.peoplechart.com/</a>                                                                                                                                                           | yes          | yes               |
| 46. <a href="http://www.personalmd.com/">http://www.personalmd.com/</a>                                                                                                                                                             | yes          | yes               |
| 47. <a href="https://www.phr4me.com/">https://www.phr4me.com/</a>                                                                                                                                                                   | yes          | yes               |
| 48. <a href="https://www.relayhealth.com/rh/default.aspx">https://www.relayhealth.com/rh/default.aspx</a>                                                                                                                           | yes          | yes               |
| 49. <a href="http://www.securamed.com/">http://www.securamed.com/</a>                                                                                                                                                               | yes          | yes               |
| 50. <a href="http://www.synchart.com/">http://www.synchart.com/</a>                                                                                                                                                                 | yes          | yes               |
| 51. <a href="http://www.telemedical.com/">http://www.telemedical.com/</a>                                                                                                                                                           | yes          | yes               |
| 52. <a href="http://www.touchnetworks.com/">http://www.touchnetworks.com/</a>                                                                                                                                                       | yes          | no                |
| 53. <a href="http://www.travhealth.fr/travhealth/src/g_service.asp?langue=UK&amp;mscssid=UVKH32RB8WS92J5X00J859190448">http://www.travhealth.fr/travhealth/src/g_service.asp?langue=UK&amp;mscssid=UVKH32RB8WS92J5X00J859190448</a> | no           | yes               |
| 54. <a href="https://www.mivia.org/">https://www.mivia.org/</a>                                                                                                                                                                     | yes          | no                |
| 55. <a href="http://www.vitalchart.com">http://www.vitalchart.com</a>                                                                                                                                                               | yes          | yes               |
| 56. <a href="https://healthmanager.webmd.com/manager/default.aspx?secure=1">https://healthmanager.webmd.com/manager/default.aspx?secure=1</a>                                                                                       | yes          | yes               |
| 57. <a href="http://www.worldmedcard.com/">http://www.worldmedcard.com/</a>                                                                                                                                                         | yes          | no                |
| 58. <a href="https://www.zebrahealth.com/">https://www.zebrahealth.com/</a>                                                                                                                                                         | yes          | yes               |
